# Supplementary material
Source: publisher site journal article supplement (https://www.dovepress.com/article/246566)
Supplement: Supplementary file 1 [file get_supplementary_file.php]

Supplementary Figure 1

OS based on CEA with N0 (A), N1 (C), N2 (E), N3 (G) and FAR with N0 (B), N1 (D), N2 (F), N3 (H) in GC patients.


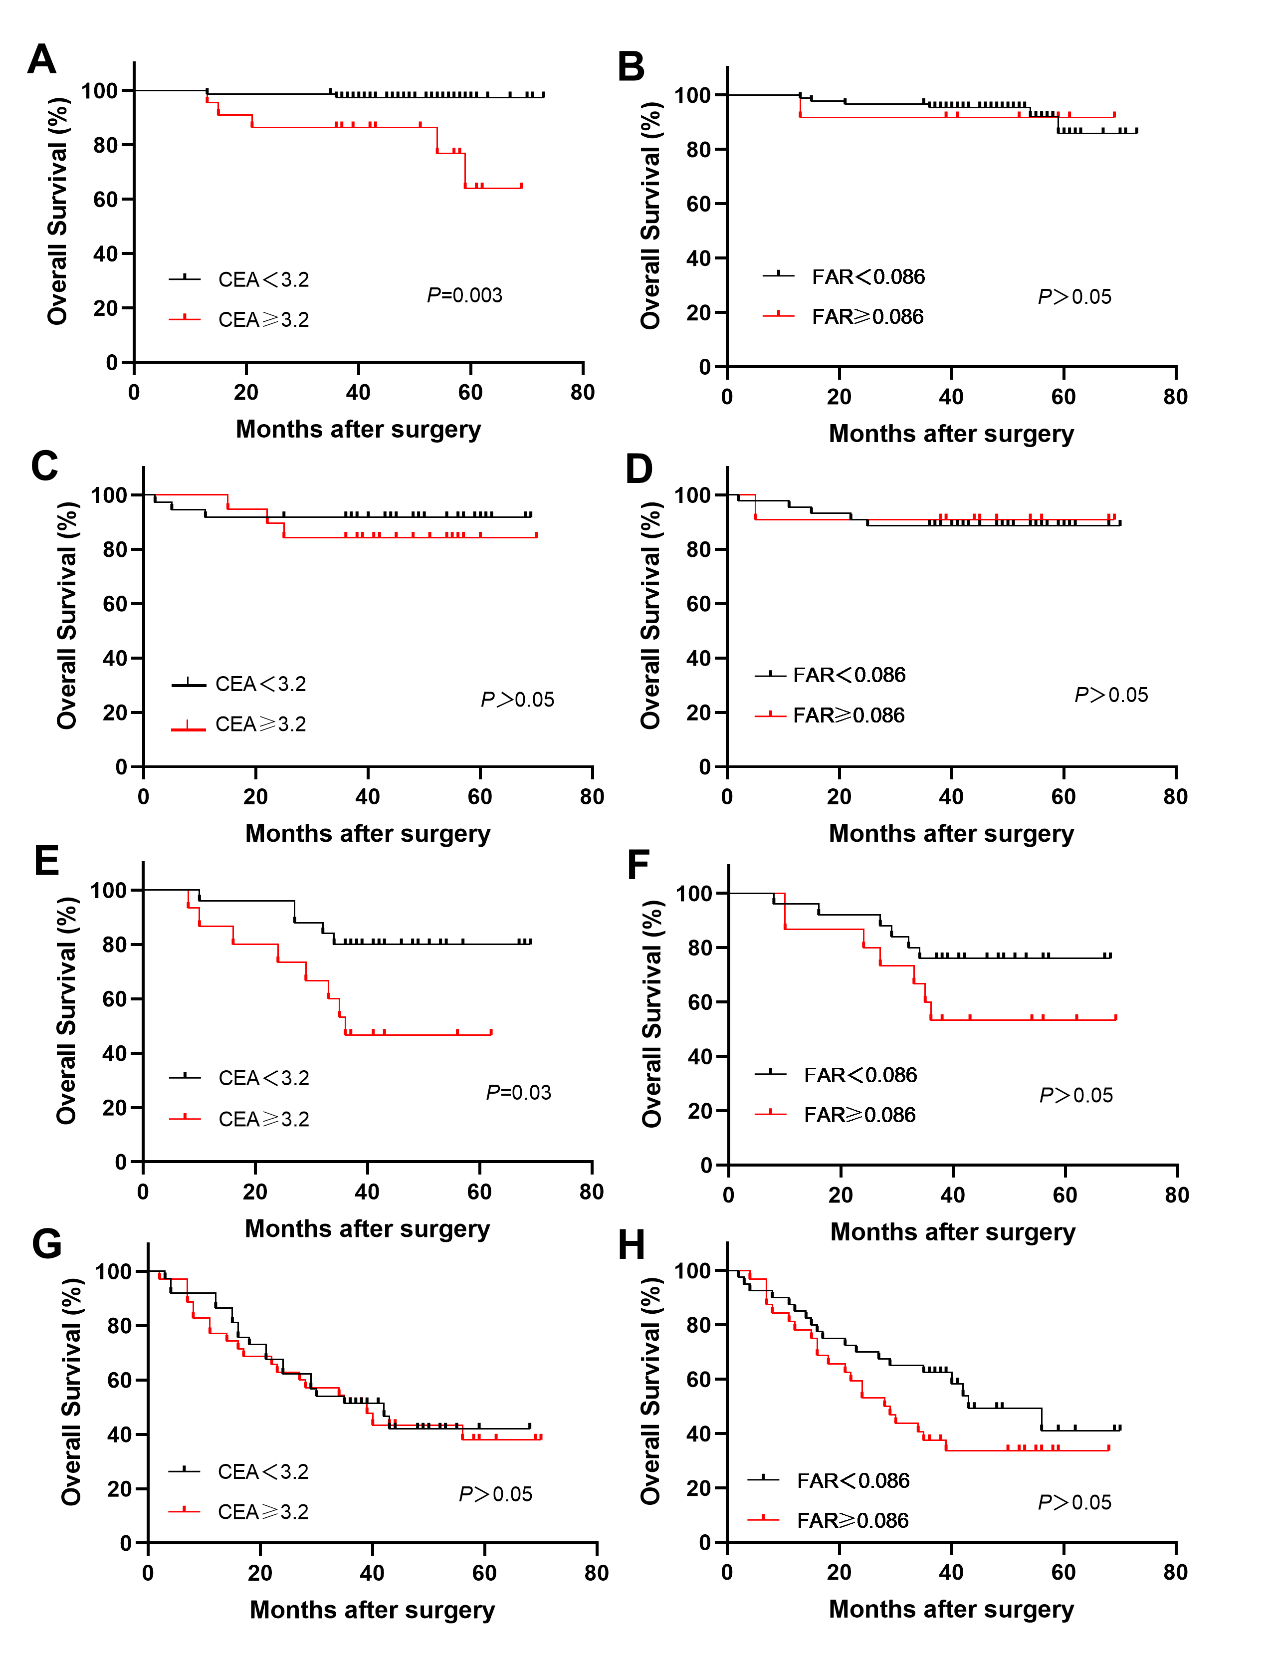


**Abbreviations:** OS, overall survival; GC, gastric cancer; CEA, carcinoembryonic antigen; FAR, fibrinogen/albumin ratio.

Supplementary Figure 2

OS based on CEA-FAR of stageⅠ(A) and stage Ⅱ (B) in GC patients.


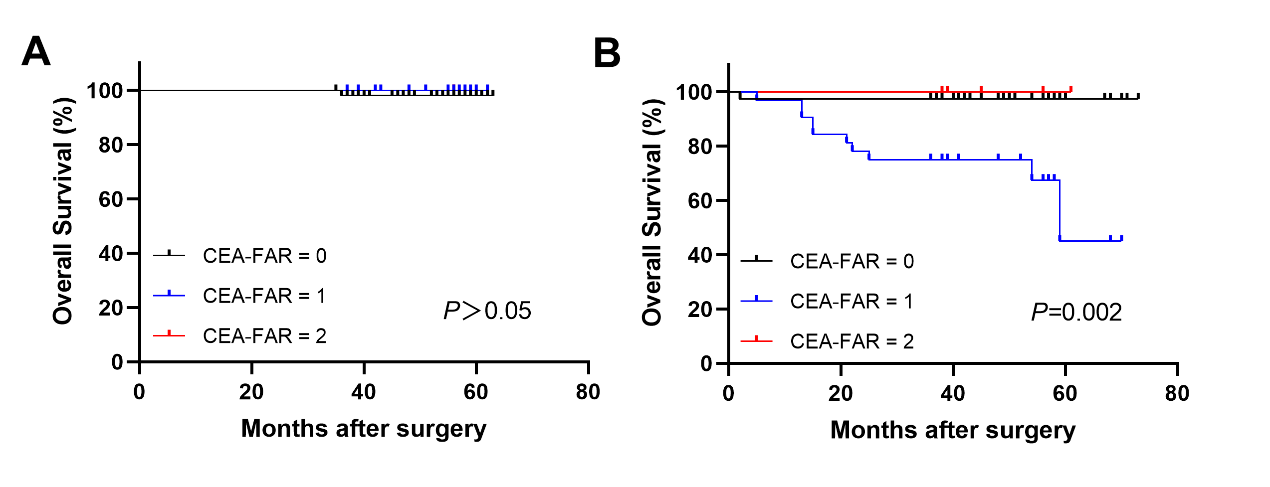


**Note:** CEA-FAR: CEA<3.2 and FAR<0.086 represent 0, CEA≥3.2 or FAR≥0.086 represent 1, CEA≥3.2 and FAR≥0.086 represent 2.

**Abbreviations:** OS, overall survival; GC, gastric cancer; CEA, carcinoembryonic antigen; FAR, fibrinogen/albumin ratio.
